# Supplementary material for: Concurrent activation of growth factor and nutrient arms of mTORC1 induces oxidative liver injury
Source: PubMed Central journal article supplement (PMC6868011; doi:10.1038/s41421-019-0131-9), 2019-11-19
Supplement: 41421_2019_131_MOESM3_ESM.pdf [file 41421_2019_131_MOESM3_ESM.pdf]

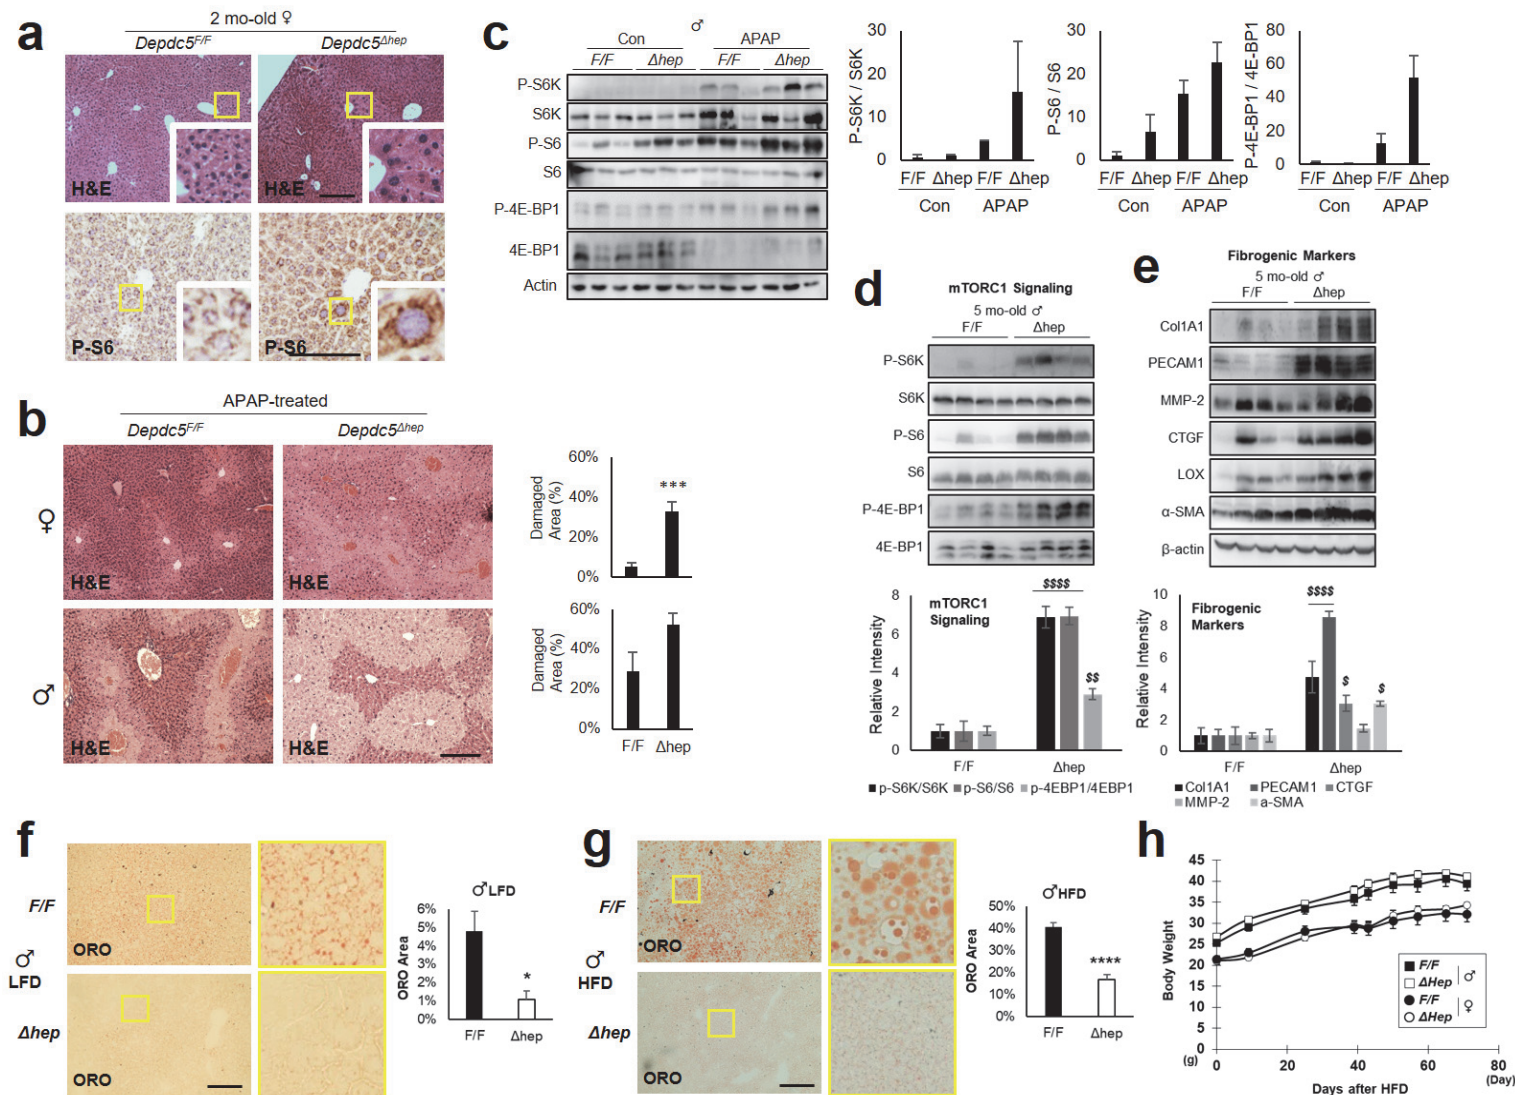

**Fig. S1: Liver phenotypes of *Depdc5<sup>Ahep</sup>* mice.** **a**, Liver sections were subjected to H&E staining and anti-phospho-S6 immunostaining for 2-month-old females of the Fig. 1 cohort. Boxed areas are magnified in the insets. **b, c**, After 12 hours of fasting, 2-month-old *Depdc5<sup>F/F</sup>* and *Depdc5<sup>Ahep</sup>* littermate mice of indicated gender were injected with 400 mg/Kg of APAP. After 8 hours, livers were collected and analyzed by H&E staining (**b**) and immunoblotting (**c**). Damaged areas ( $n \geq 8$ ) and band intensities ( $n=3$ ) were quantified. **d, e**, Liver lysates from 5-month-old *Depdc5<sup>F/F</sup>* and *Depdc5<sup>Ahep</sup>* littermate male mice were subjected to immunoblotting (upper panels) and quantification (lower panels;  $n=4$ ) to analyze mTORC1 signaling (**d**) and fibrogenic markers (**e**). **f, g**, Two-month-old *Depdc5<sup>F/F</sup>* and *Depdc5<sup>Ahep</sup>* littermate male mice were kept on normal chow (LFD) (**f**) or high fat diet (HFD) (**g**) for three additional months. Livers from the 5-month-old mice were subjected to Oil Red O (ORO) staining. ORO-positive areas were quantified (right panels,  $n=3$ ). Boxed areas are magnified in right panels. **h**, Body weight was monitored during HFD feeding (male,  $n=8$ ; female,  $n \geq 4$ ). Data are presented as mean  $\pm$  SEM. \* $P < 0.05$ ; \*\*\* $P < 0.001$ ; \*\*\*\* $P < 0.0001$  (Student's t-test). When multiple parameters were assessed, the Holm-Šidák method was used to compare groups (\$,  $P < 0.05$ ; \$\$,  $P < 0.01$ ; \$\$\$,  $P < 0.0001$ ). Scale bars, 200  $\mu$ m.

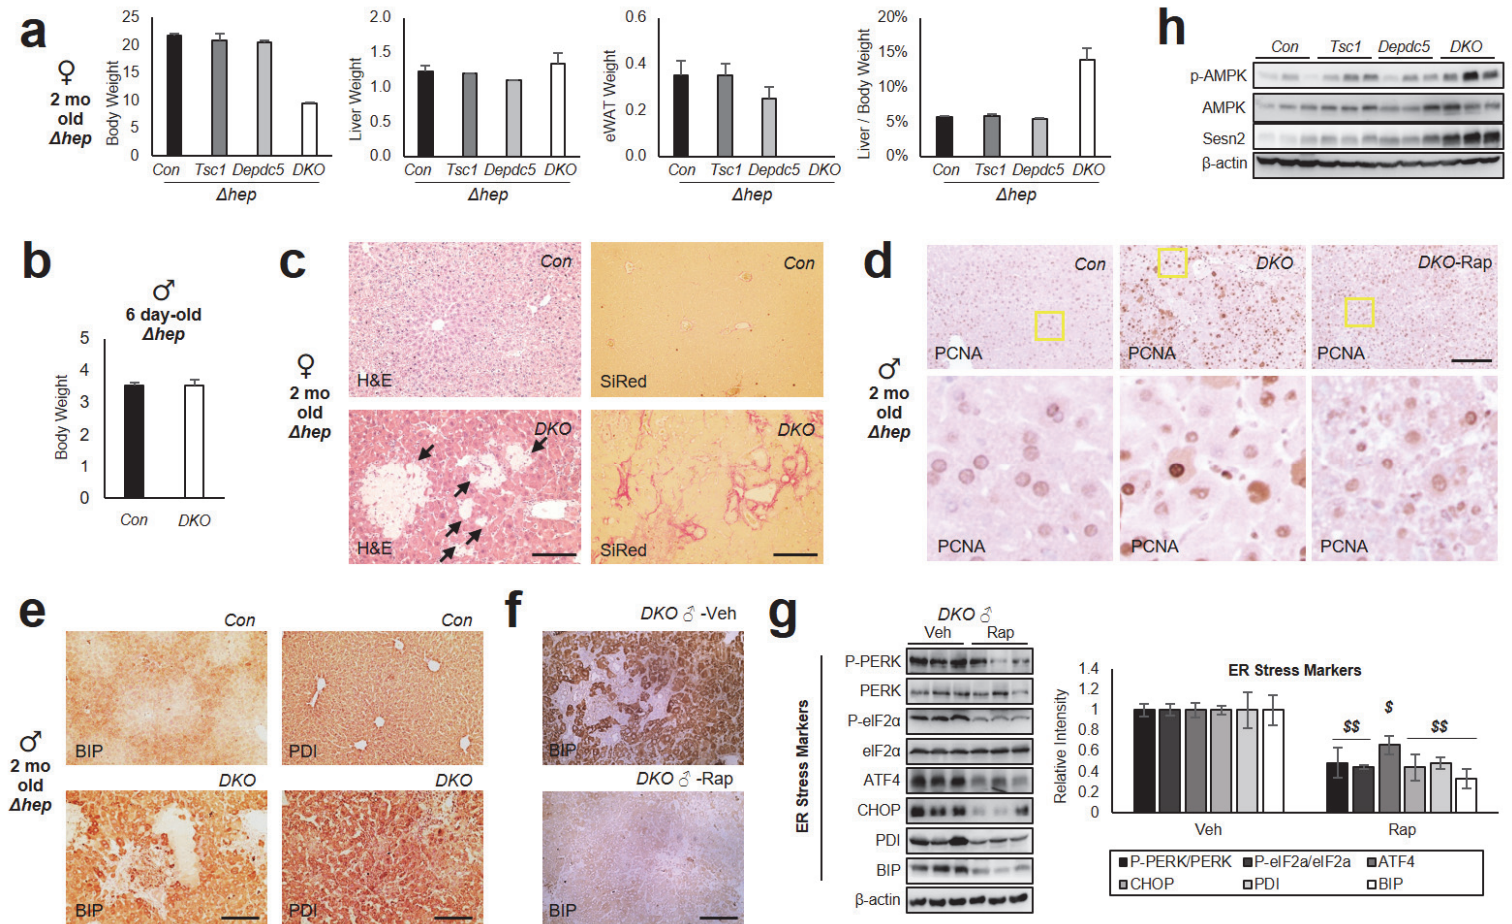

**Fig. S2: DKO mice exhibit mTORC1-dependent liver pathologies.** **a**, Body, liver, eWAT weights, and liver/body weight ratios were analyzed for females of the Fig. 2 cohort ( $n \geq 3$  for Con and DKO;  $n = 2$  for single knockouts). **b**, Body weights were analyzed for male pups at 6 days after birth ( $n \geq 3$ ). **c**, H&E and SiRed staining images from livers of the Fig. 2 female cohort. **d**, **e**, PCNA (**d**), BIP and PDI (**e**) immunostaining images from livers of the Fig. 2 male cohort. Boxed areas are magnified in bottom panels (**d**). **f**, BIP immunostaining images from livers of the Fig. 4 cohort. **g**, Immunoblotting of ER stress markers (left panel) and quantification (right panel,  $n = 3$ ) for livers of the Fig. 4 cohort.  $\beta$ -actin image is the same as the one presented in Fig. 4f. **h**, Immunoblotting of indicated proteins for livers of the Fig. 3 cohort. Data are presented as mean  $\pm$  SEM. The Holm-Šidák method was used for multiple comparison tests ( $\$, P < 0.05$ ;  $\$, P < 0.01$ ). Scale bars, 200  $\mu$ m.

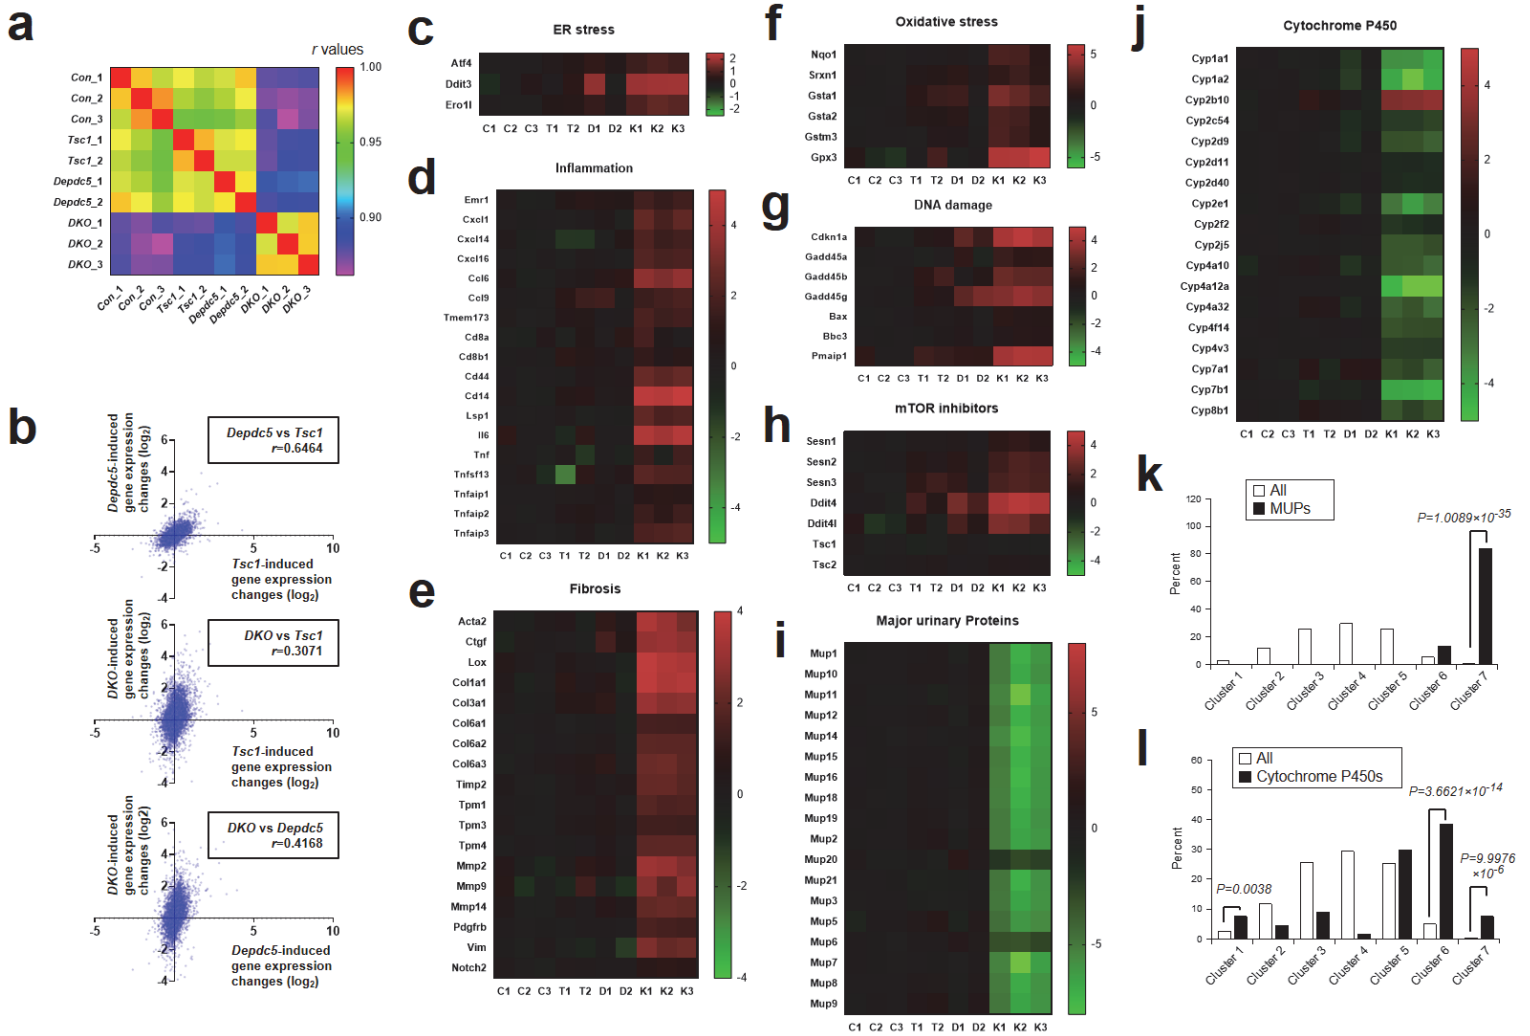

**Fig. S3: The DKO transcriptome profile is distinct from controls and single knockout mutants and is characterized by stress response.** **a**, Heat map diagram depicting the correlation between individual RNA-seq profiles. **b**, Comparison of mRNA expression fold change over control liver samples between indicated liver samples. Individual dots represent single mRNA species. **c-j**, Heat map diagrams representing mRNA expression fold change from averaged control values (expressed as log<sub>2</sub> values). Each column represents a liver sample from a different *Con* (C1-3), *Tsc1*<sup>Δhep</sup>(T1-2), *Depdc5*<sup>Δhep</sup>(D1-2), or *DKO* (K1-3) mouse. **k**, Gene cluster enrichment analysis of major urinary proteins (MUPs). **l**, Gene cluster enrichment analysis of Cytochrome P450s. Correlations between RNA-seq datasets were assessed by computing a nonparametric Spearman correlation (*r*);  $P < 0.0001$  for all correlation observations. Statistical significance of gene enrichments in a specific cluster was examined by Fisher's exact test.

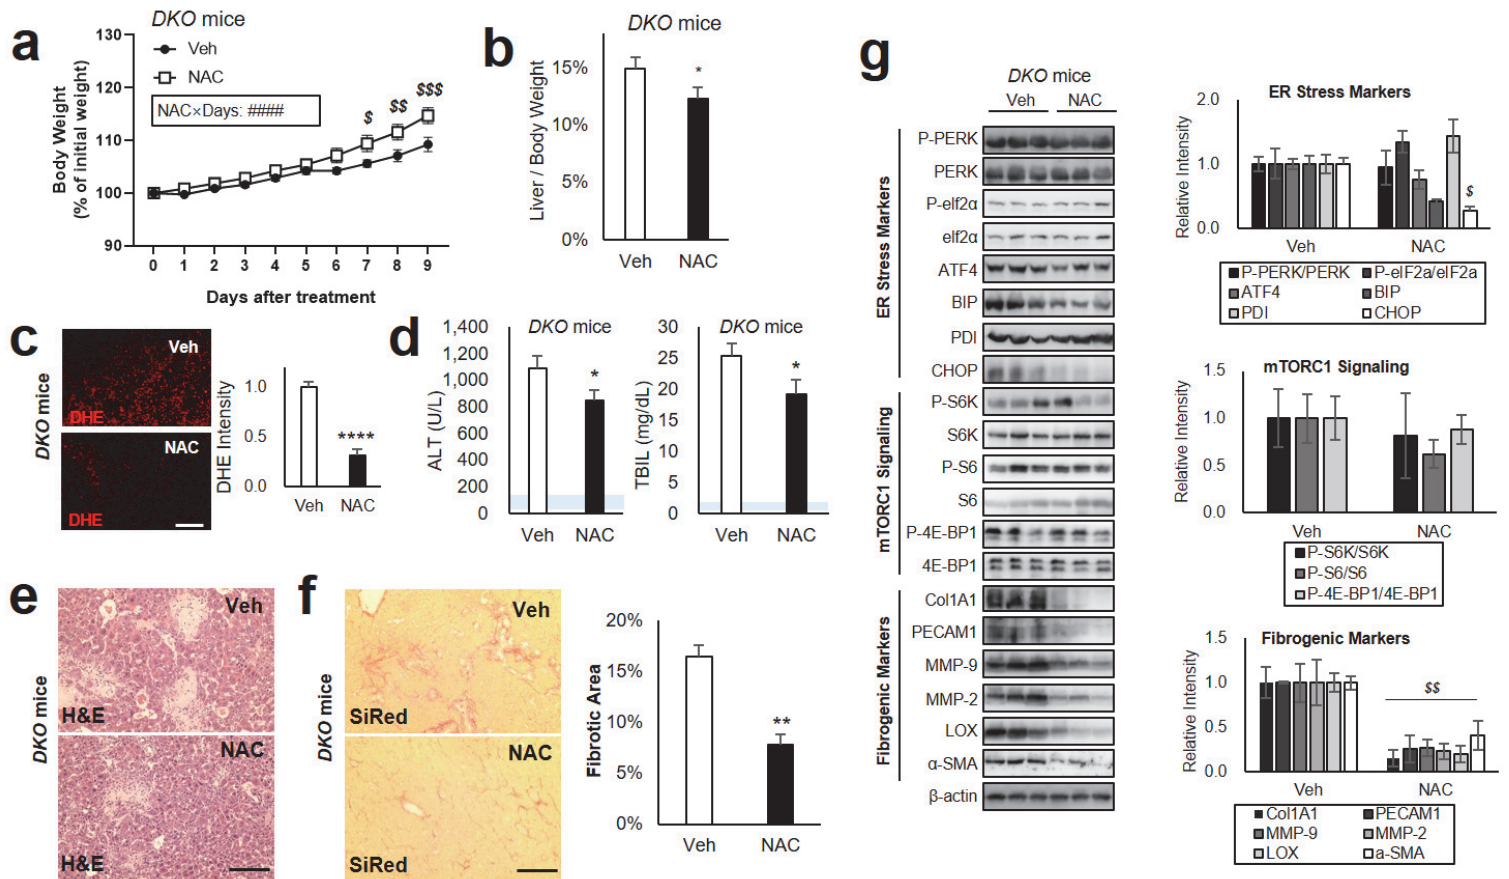

**Fig. S4: N-acetylcysteine (NAC) relieves DKO liver pathologies.** Littermate cohorts of six-week-old DKO mice were injected daily with vehicle (Veh) or NAC (250 mg/kg) for 10 days ( $n \geq 10$ ). For drug treatment experiments, mice were gender-matched with both males and females. **a**, Body weight was monitored throughout the course of the experiment. **b**, Liver/body weight ratio was measured at the experimental endpoint. **c**, Dihydroethidium (DHE) staining of liver sections and quantification. **d**, Serum markers for liver damage were analyzed. Blue shaded regions indicate clinically normal ranges. **e**, Liver sections were analyzed by H&E staining. **f**, Liver sections were analyzed by SiRed staining. Fibrotic areas were quantified. **g**, Liver lysates were subjected to immunoblotting (left panels) and quantification (right panels) to examine ER stress markers (top), mTORC1 signaling (middle), and fibrogenic markers (bottom). Data are presented as mean  $\pm$  SEM. \* $P < 0.05$ ; \*\* $P < 0.01$ ; \*\*\*\* $P < 0.0001$  (Student's t-test). Interaction between NAC and treatment days (NAC×Days) were assessed through RM two-way ANOVA (#####,  $P < 0.0001$ ), and differences in individual data points were assessed through Sidak's multiple comparison test (\$,  $P < 0.05$ ; \$\$,  $P < 0.01$ ; \$\$\$,  $P < 0.001$ ). For western blot quantification, the Holm-Šidák method was used to compare groups (\$,  $P < 0.05$ ; \$\$,  $P < 0.01$ ). Scale bars, 200  $\mu$ m.

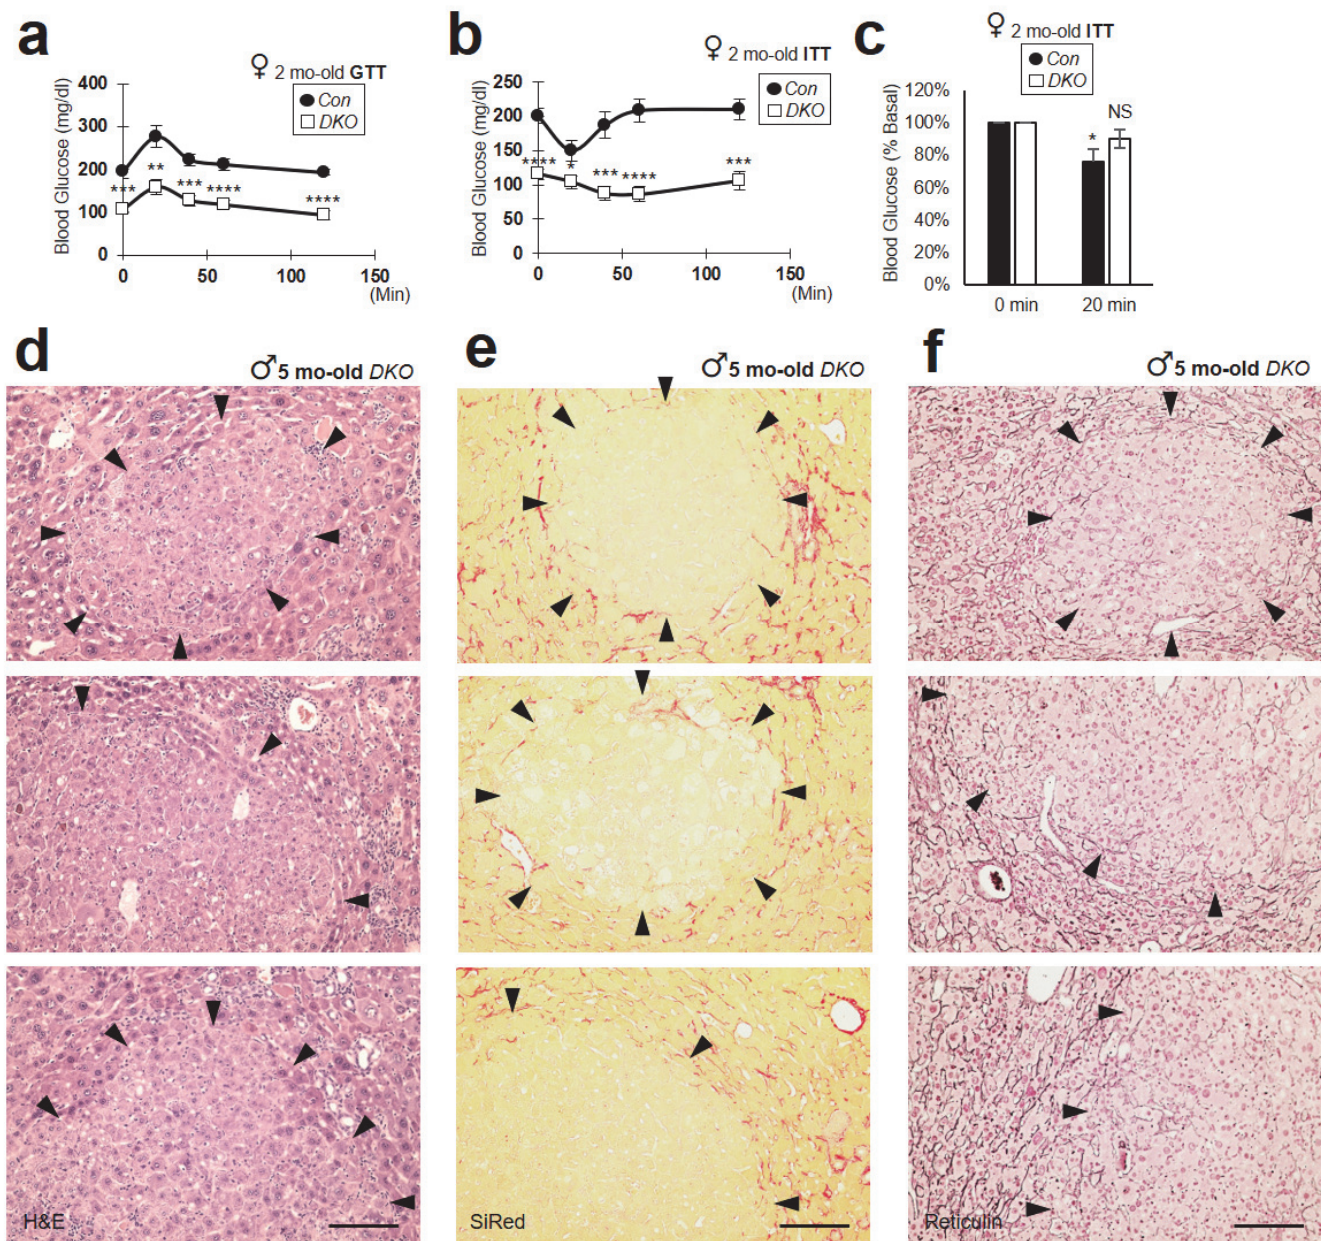

**Fig. S5: *DKO* mice have glucose metabolism defects and HCC development.** **a-c**, After 4-6 hours of fasting, two-month-old *Con* and *DKO* female littermates ( $n \geq 7$ ) were subjected to **(a)** glucose and **(b)** insulin tolerance tests (GTT and ITT, respectively). Data are normalized according to baseline glucose levels **(c)**. **d-f**, Additional histology images for Fig. 8e upper right **(d)**, 8e middle left **(e)** and 8e middle right **(f)** are presented. Arrowheads indicate approximate boundaries of tumor nodules. Data are presented as mean  $\pm$  SEM. \* $P < 0.05$ , \*\* $P < 0.01$ , \*\*\* $P < 0.001$ , \*\*\*\* $P < 0.0001$ , NS ( $P = 0.1050$ ) from a Student's t-test. Scale bars, 200  $\mu\text{m}$ .
